# Supplementary material for: Development of an endoplasmic reticulum-targeting fluorescent probe for the two-photon imaging of hypochlorous acid (HClO) in living cells
Source: Royal Society of Chemistry journal article supplement (doi:10.1039/c9ay01390c), 2019-01-01
Supplement: c9ay01390c1.pdf [file c9ay01390c1.pdf]

*Supporting information for*

**Development of an endoplasmic reticulum-targeted fluorescent probe  
for the two-photon imaging of hypochlorous acid in living cells**

Wenhui Song, Baoli Dong, Yaru Lu, Xiuqi Kong, Abdul Hadi Mehmood and Weiyong Lin\*

*Institute of Fluorescent Probes for Biological Imaging, School of Chemistry and Chemical Engineering, School of Materials Science and Engineering, University of Jinan, Jinan, Shandong 250022, P.R. China.*

\*Corresponding Author.

Tel.: +86 53182769108.

*E-mail address:* weiyonglin2013@163.com.

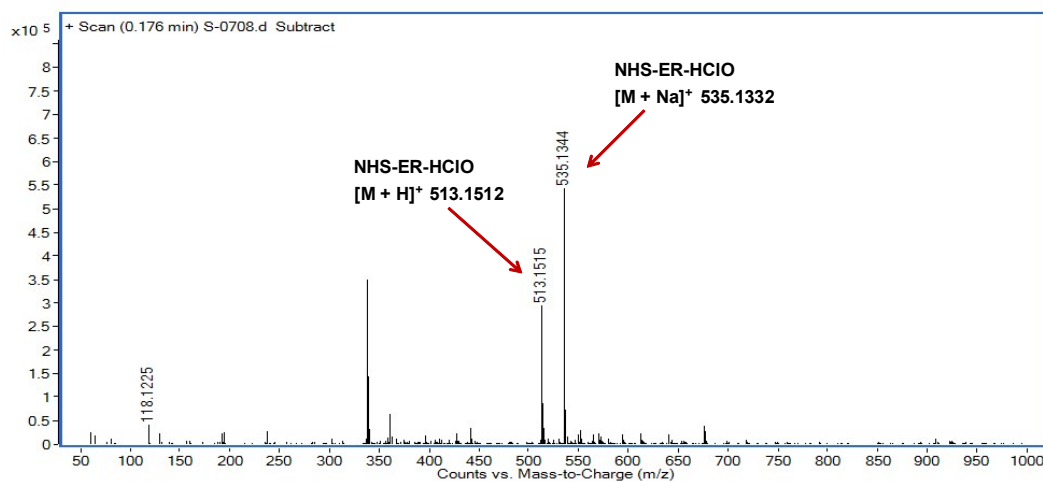

**Fig. S1.** HRMS data of the probe NHS-ER in presence of NaClO in PBS.

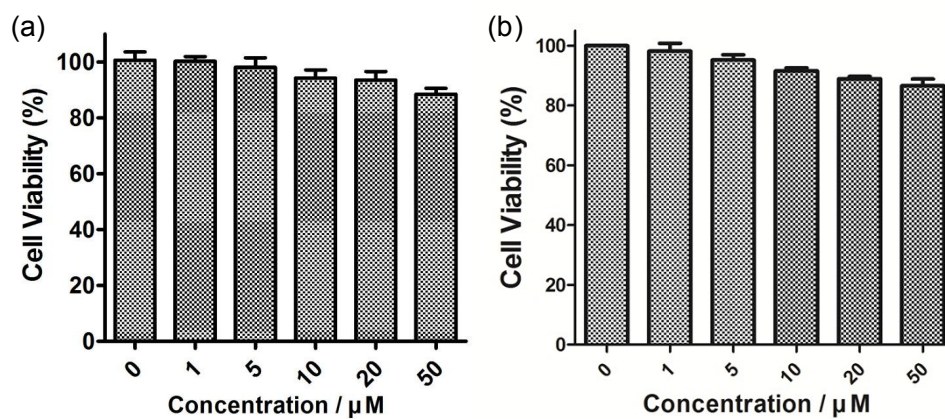

**Fig. S2.** MTT assay of HeLa (a) and Raw264.7 (b) cells in the presence of various concentrations of NHS-ER

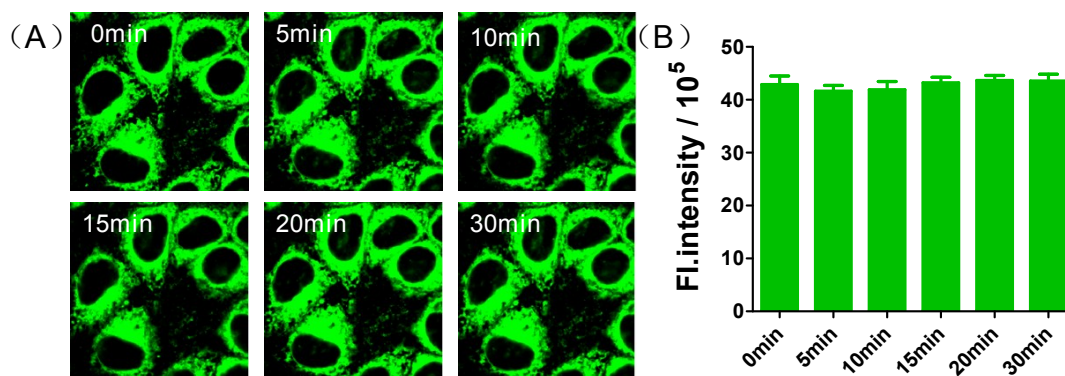

**Fig. S3.** Photostability tests of the probe 10  $\mu$ M NHS-ER in HeLa cells. (A) The in situ imaging of HeLa cells at 0, 5, 10, 15, 20, 30 min, respectively. (B) The in situ fluorescence intensity of NHS-ER in HeLa cells at 0, 5, 10, 15, 20, 30 min, respectively. Scale bar = 20  $\mu$ m.  $\lambda_{em}$  = 500-550 nm,  $\lambda_{ex}$  = 405 nm.

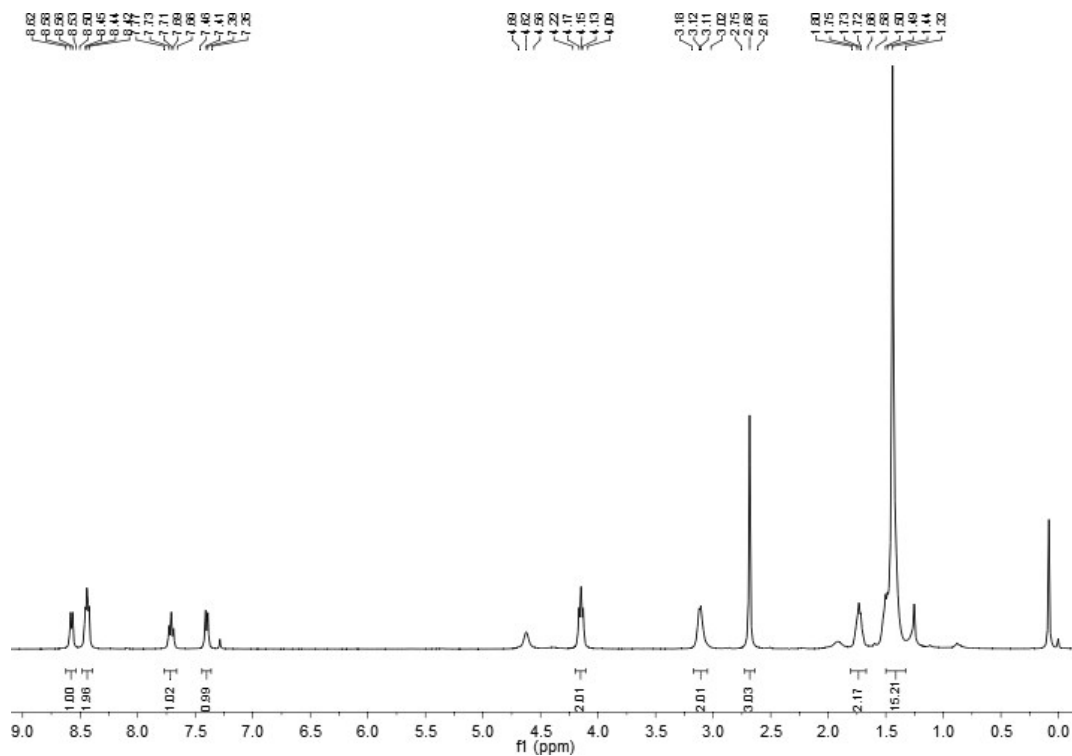

**Fig. S4.**  $^1\text{H}$  NMR data of compound 1( $\text{CDCl}_3$ ).

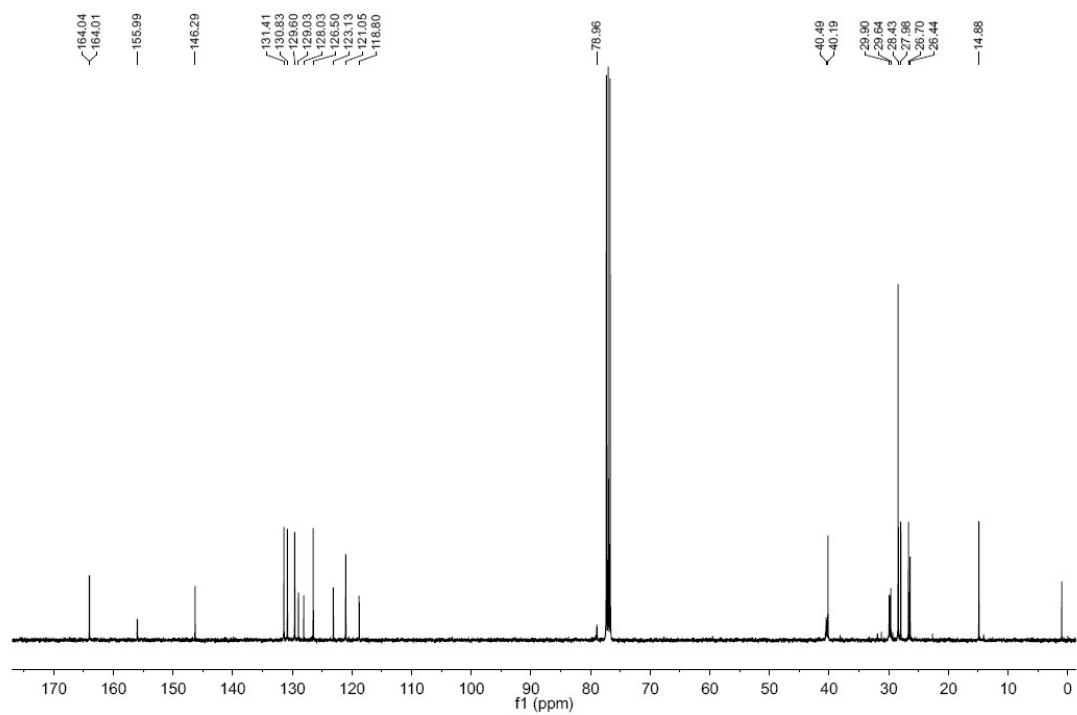

Fig. S5.  $^{13}\text{C}$  NMR data of compound 1 ( $\text{CDCl}_3$ ).

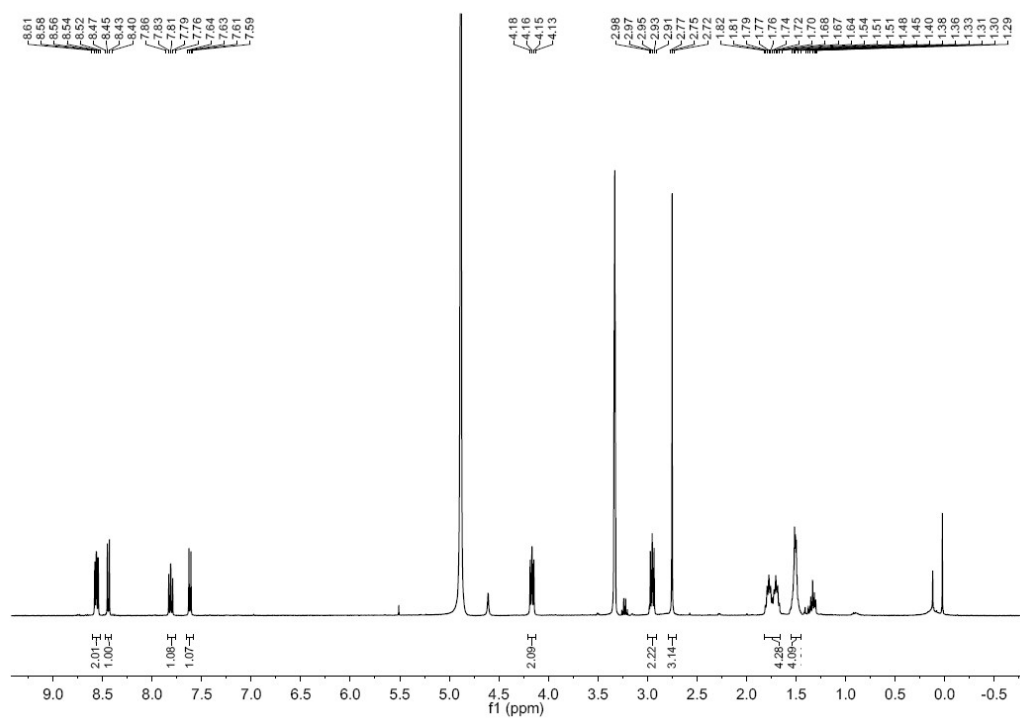

Fig. S6.  $^1\text{H}$  NMR data of compound 2 ( $\text{MeOH-}d_4$ ).

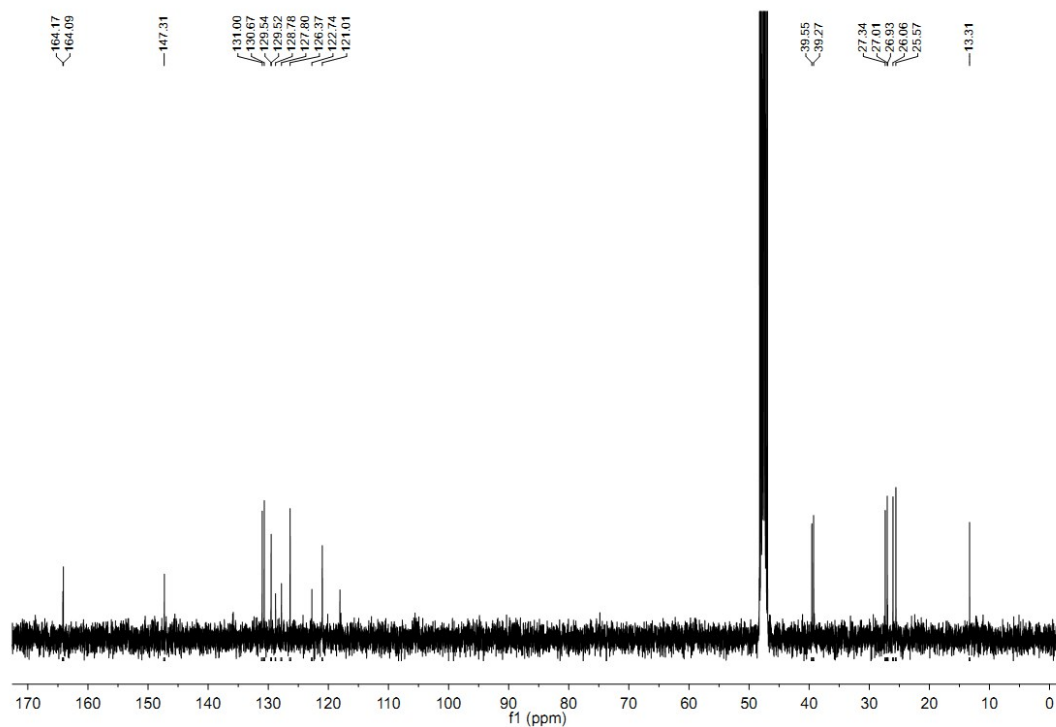

Fig. S7.  $^{13}\text{C}$  NMR data of compound 2 ( $\text{MeOH-}d_4$ ).

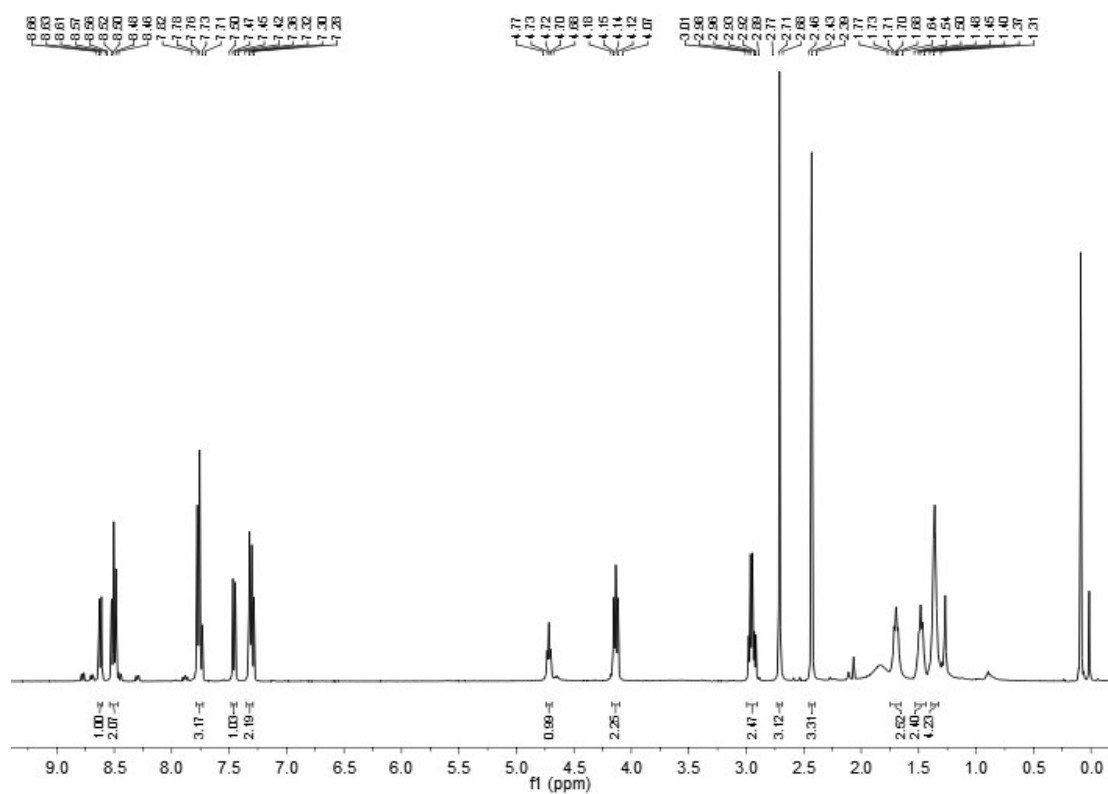

Fig. S8.  $^1\text{H}$  NMR data of compound NHS-ER( $\text{CDCl}_3$ ).

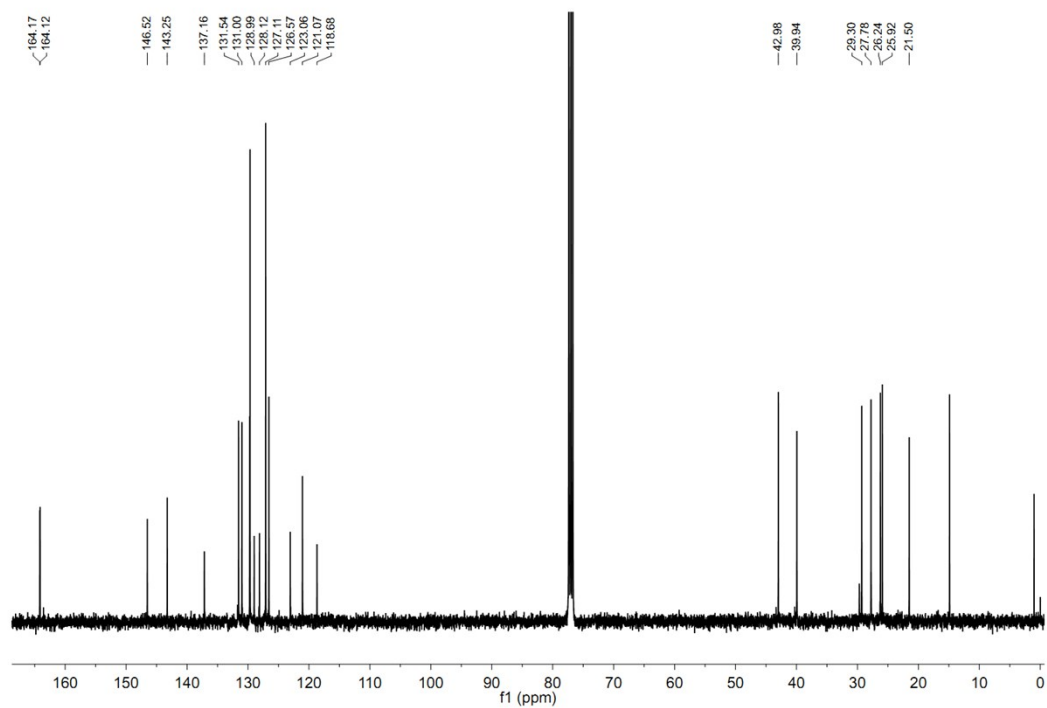

**Fig. S9.**  $^{13}\text{C}$  NMR data of compound NHS-ER( $\text{CDCl}_3$ ).

| Probes | Chemical structure | Response mechanism | probe types | Emission | Detection limit    | Two-photon | targeting ability | Ref       |
|--------|--------------------|--------------------|-------------|----------|--------------------|------------|-------------------|-----------|
| NHS-ER |                    | ICT                | Turn-off    | 405nm    | 0.76 $\mu\text{M}$ | Yes        | ER-targeting      | This work |

|                            |                                                                                     |       |             |       |                         |     |                         |   |
|----------------------------|-------------------------------------------------------------------------------------|-------|-------------|-------|-------------------------|-----|-------------------------|---|
| PZ-HA                      | 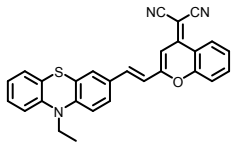   |       | Turn-on     | 450nm | 0.72 $\mu$ M            | No  | No                      | 1 |
| BODH                       |    |       | Turn-on     | 470nm | 0.205 $\mu$ M           | No  | No                      | 2 |
| Cou-dhz-Ph-NO <sub>2</sub> |    |       | Turn-on     | 430nm | Not mentioned           | No  | No                      | 3 |
| RGNH                       |    |       | Turn-on     | 500nm | 3.3nm                   | No  | No                      | 4 |
| Lyso-NDMTC                 |   | ICT   | Turn on     | 410nm | 7.6pM                   | Yes | Lysosomes targeting     | 5 |
| Lyso-HOCl                  |  |       | Turn off    | 520nm | 8pM                     | No  | Lysosomes targeting     | 6 |
| Lyso-HA                    |  | ESIPT | Ratiometric | 365nm | Not mentioned           | No  | Lysosomes targeting     | 7 |
| LR1                        |  |       | Turn on     |       | 2.6nm                   | No  | Lysosomes targeting     | 8 |
| Cy7-NphS                   |  | PET   | Turn on     | 750nm | 0.62 $\pm$ 0.09 $\mu$ M | No  | mitochondrial targeting | 9 |

|        |                                                                                     |     |             |       |          |     |                         |    |
|--------|-------------------------------------------------------------------------------------|-----|-------------|-------|----------|-----|-------------------------|----|
| HCCH   | 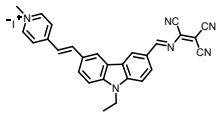   |     | Turn on     | 436nm | 0.44 μM  | No  | mitochondrial targeting | 10 |
| PNIS   |    |     | Turn on     | 325nm | 0.210 μM | No  | mitochondrial targeting | 11 |
| Nap-Se |    | PET | Turn on     | 405nm | 4.8 nM   | No  | mitochondrial targeting | 12 |
| 4      |    |     | Ratiometric | 326nm | 3.6 μM   | Yes | ER-targeting            | 13 |
| ER-CIO |  |     | Ratiometric | 425nm | 0.59 μM  | No  | ER-targeting            | 14 |

Table S1. Summary of the properties of representative fluorescent probes for detecting HClO.

## References

- [1] B. Deng, M. Ren, X. Kong, K. Zhou and W. Lin. *Sens. Actuators B*, 2018, **255**, 963–969.
- [2] W-C Chen, P. Venkatesan and S-P Wu. *New J.Chem.*, 2015, **39**, 6892-6898.
- [3] T. Li, L. Wang, S. Lin, X. Xu, M. Liu, S. Shen, Z. Yan and R. Mo. *Bioconjugate Chem*, 2018, **29**, 2838–2845.
- [4] Z. Zhang, C. Deng, L. Meng, Y. Zheng and X. Yan. *Anal. Methods*, 2015, **7**, 107-114.
- [5] B. Zhu, P. Li, W. Shu, X. Wang, C. Liu, Y. Wang, Z. Wang, Y. Wang and B. Tang. *Anal. Chem.*, 2016, **88**, 12532–12538.



- [6] Y.Wang, L. Wu, C. Liu, B. Guo, B. Zhu, Z. Wang, Q.Duan, Z. Ma and X. Zhang. *J. Mater. Chem. B*, 2017, **5**, 3377-3382.
- [7] M. Ren, B. Deng, K. Zhou, X.Kong, J. Wang, G. Xu and W. Lin. *J. Mater. Chem. B*, 2016, **4**, 4739-4745.
- [8] X. Huang, Z. Wang, Y. Lv, S.Shen, Y. Zhu, J. Wang, Y. Zhang, J. Wang, Y. Ge and X. Cao. *New J.Chem.*, 2018, **42**, 11480
- [9] F.Tian, Y. Jia, Y. Zhang, W. Song, G. Zhao, Z. Qu, C. L, Y.Chen and P. Li. *Biosensors and Bioelectronics*, 2016, **86**, 68–74.
- [10] Y. Feng, S. Li, D. Li, Q. Wang, P. Ning, M. Chen, X. Tian and X. Wang. *Sens. Actuators B*, 2018, **254**, 282–290.
- [11] Q. Xu, C. H. Heo, J. A. Kim, H. S. Lee, Y. Hu, D. Kim, K. M. K. Swamy, G. Kim, S-J Nam, H. M. Kim and J. Yoon. *Anal. Chem.*, 2016, **88**, 6615–6620.
- [12] X. Lv, X. Yuan, Y. Wang and W. Guo. *New J.Chem.*, 2018, **42**, 15105-15110.
- [13] Y. L. Pak, S. J. Park, G. Song, Y. Yim, H. Kang, H. M. Kim, J. Bouffard and J. Yoon. *Anal. Chem.*, 2018, **90**, 12937–12943.
- [14] J. Hou, H. S. Kim, C. Duan, M. S. Ji, S. Wang, L. Zeng, W. X. Ren and J. S. Kim. *Chem. Commun.*, 2019, **55**, 2533-2536.
